# Supplementary material
Source: MDPI journal article supplement (https://www.mdpi.com/1424-2818/15/7/879)
Supplement: s1 [file s1]

# Ethnobotanical Survey on Plants Used to Manage Febrile Illnesses among Herbalists in Casablanca, Morocco

Amal Dagni <sup>1†</sup>, Ramona Suharoschi <sup>2,3†</sup>, Simona-Codruta Hegheș <sup>4</sup>, Rodica Vârbă <sup>5</sup>, Oana Lelia Pop <sup>2,3\*</sup>, Romana Vulturar <sup>6,7</sup>, Adriana Fodor <sup>8</sup>, Angela Cozma <sup>9</sup>, Abdelaziz Soukri <sup>1</sup> and Bouchra El Khalfi <sup>1\*</sup>

## Supplementary material 1:

- Sample size calculation

The sample size for the study was calculated using the formula given by Lwanga and Lemeshow [23].

$$N = Z^2 p(1 - p) / d^2$$

Where,  $N$  = Size of the sample

$z$  = Substituting the  $z$  value of 1.96

$p$  = the anticipated population proportion as 60%

$d$  = the degree of precision 0.05

The sample size was calculated as 384 registered herbalists in Casablanca.

The number of registered herbalists in Casablanca was 110 according to documentary evidence in 2019 [75]. the sample size was modified using the formula given by Israel [76].

$$n = \frac{m}{1 + \frac{(m - 1)}{N}}$$

where,  $n$  = Sample size

$m$  = calculated sample size

$N$  = total study population

After applying the finite population correction factor, the required minimum sample size was 86.

# Ethnobotanical Survey on Plants Used to Manage Febrile Illnesses among Herbalists in Casablanca, Morocco

Amal Dagni <sup>1†</sup>, Ramona Suharoschi <sup>2,3†</sup>, Simona-Codruta Hegheș <sup>4</sup>, Rodica Vârban <sup>5</sup>, Oana Lelia Pop <sup>2,3\*</sup>, Romana Vulturar <sup>6,7</sup>, Adriana Fodor <sup>8</sup>, Angela Cozma <sup>9</sup>, Abdelaziz Soukri <sup>1</sup> and Bouchra El Khalfi <sup>1\*</sup>

## Supplementary material 2:

### Eligibility Criteria

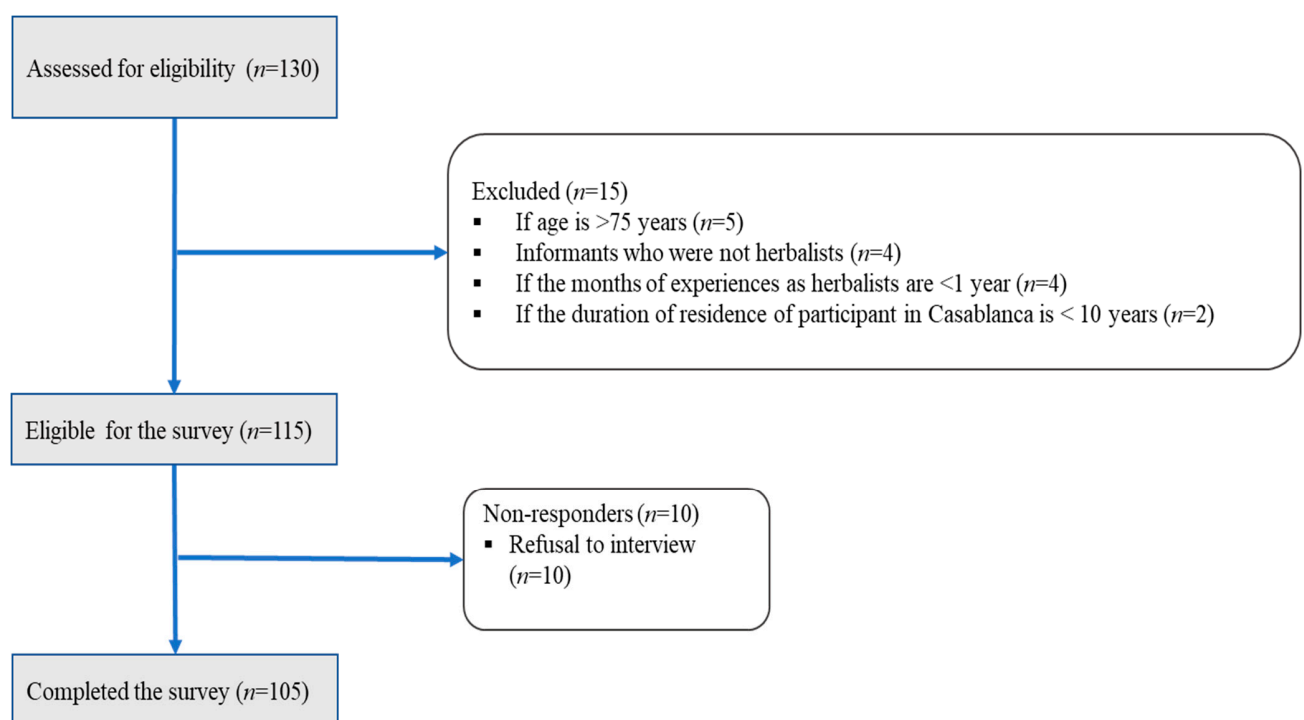

**Figure 2.** Flowchart for Enrolling Study Participants

# Ethnobotanical Survey on Plants Used to Manage Febrile Illnesses among Herbalists in Casablanca, Morocco

Amal Dagni <sup>1†</sup>, Ramona Suharoschi <sup>2,3†</sup>, Simona-Codruta Hegheș <sup>4</sup>, Rodica Vârban <sup>5</sup>, Oana Lelia Pop <sup>2,3\*</sup>,  
Romana Vulturar <sup>6,7</sup>, Adriana Fodor <sup>8</sup>, Angela Cozma <sup>9</sup>, Abdelaziz Soukri <sup>1</sup> and Bouchra El Khalfi <sup>1\*</sup>

Supplementary material 3:

## *Questionnaire:*

### Personal information

- Region:

- Gender:

- ☐ Female  
☐ Male

- Age:

- ☐ A1 < 20 years ☐ A2: (20-60) ☐ A3 > 60

-Educational status:

.....

-Source of Knowledge:

.....

## **Plant**

**-Vernacular name:** .....

**-Treated diseases:** .....

### **- State of use:**

☐ Fresh

☐ Dried

### **- Part used:**

☐ Leaves

☐ Fruits

☐ Stem

☐ Root

☐ Seed

☐ Others;

### **- Form of employment**

☐ Powder

☐ Essential oil

☐ Extract

☐ Others;

### **- Method of preparation:**

☐ Decoction

☐ Infusion

☐ Others;

### **-Method of administration:**

☐ Oral

☐ Massage

☐ Others;

### **-Dose used:**

☐ Spoon

☐

- ☐ Pinch
- ☐ Others;

**-Duration of use:**

- ☐ One day
- ☐ One week
- ☐ One month
- ☐ until healed

**-Results:**

- ☐ Improvement
- ☐ Healing
- ☐ Ineffective
- ☐ Others;

**-Side effects :** .....

**-Toxicity of the plant:**

Yes

No

**- Precautions for use:** .....

# Ethnobotanical Survey on Plants Used to Manage Febrile Illnesses among Herbalists in Casablanca, Morocco

Amal Dagni <sup>1†</sup>, Ramona Suharoschi <sup>2,3†</sup>, Simona-Codruta Hegheș <sup>4</sup>, Rodica Vârban <sup>5</sup>, Oana Lelia Pop <sup>2,3\*</sup>,  
Romana Vulturar <sup>6,7</sup>, Adriana Fodor <sup>8</sup>, Angela Cozma <sup>9</sup>, Abdelaziz Soukri <sup>1</sup> and Bouchra El Khalfi <sup>1\*</sup>

## Supplementary material 4:

**Table 5.** Traditional uses of the documented plants in Morocco.

| Species                                                 | Local name | Traditional uses                                                                                                                                                                                                                                                                        | References      |
|---------------------------------------------------------|------------|-----------------------------------------------------------------------------------------------------------------------------------------------------------------------------------------------------------------------------------------------------------------------------------------|-----------------|
| <i>Dysphania ambrosioides</i> L.<br>Mosyakin & Clemants | M'khinza   | Cutaneous infections, digestive tract infections, asthma, hepatitis, headaches, migraine, measles, jaundice, syphilis, fever.                                                                                                                                                           | [77-79]         |
| <i>Coriandrum sativum</i> L.                            | Kasbour    | Dental pain, antidiuretic, antiseptic, antispasmodic, anti-diarrhea, carminative, hypertension, cardiac disease.                                                                                                                                                                        | [80-82]         |
| <i>Artemisia herba alba</i>                             | Chih       | Gum disease, gastrointestinal infections, stomach pain, cold, nausea, wounds, rheumatism, appetite stimulant, indigestion, diarrhea, bad breath, anthelmintic, emmenagogue                                                                                                              | [80, 83]        |
| <i>Artemisia absinthium</i> L.                          | Chiba      | Gum disease, dental pain, Intestinal parasites, dyspepsia, renal colic, cold and flu, diuretic                                                                                                                                                                                          | [80,84]         |
| <i>Tetradlinis articulata</i> (Vahl)<br>Mast.           | El-Aarar   | Stomach ache, hypotensive, diabetes, endocrinological, general health, gastrointestinal, otolaryngological, and respiratory                                                                                                                                                             | [85]            |
| <i>Lagenaria siceraria</i> (Molina)<br>Standl.          | Slawi      | Headaches, migraine                                                                                                                                                                                                                                                                     | [79]            |
| <i>Clinopodium nepeta</i> (L.) Kuntze                   | Manta      | Respiratory diseases                                                                                                                                                                                                                                                                    | [86]            |
| <i>Mentha spicata</i> L.                                | Naanaa     | Cutaneous infections, gum disease, halitosis, dental pain, tooth decay, cold, grippe, migraine, respiratory, skin                                                                                                                                                                       | [77,80,87,88]   |
| <i>Lavandula dentata</i> L.                             | Khzama     | Cutaneous infections                                                                                                                                                                                                                                                                    | [77]            |
| <i>Mentha pulegium</i> L.                               | Flio       | Flu, cold, respiratory canals, pathologies of the digestive system, cold problems, and pathologies of the respiratory system                                                                                                                                                            | [79,89]         |
| <i>Salvia officinalis</i> subsp. <i>officinalis</i>     | Salmiya    | Intestinal parasites, intestinal pains, diarrhea, anxiety, wound healing                                                                                                                                                                                                                | [90]            |
| <i>Mentha suaveolens</i> Ehrh.                          | Timija     | gum disease                                                                                                                                                                                                                                                                             | [80]            |
| <i>Origanum grosii</i><br>Pau & Font Quer               | Zàater     | Diabets                                                                                                                                                                                                                                                                                 | [91]            |
| <i>Salvia rosmarinus</i> Spenn.                         | Azir       | Cutaneous infections, gum disease, hypertensive, antiseptic, anti-hepatitis, detoxifying, antioxidant, enhances memory, gastric disorders, digestive system pathologies, cardiac disease, hypertension, and diabetes, allergy, asthma, cancer, infections, and immune system depression | [76, 79-82, 92] |

|                                           |           |                                                                                                                                                                                                         |                 |
|-------------------------------------------|-----------|---------------------------------------------------------------------------------------------------------------------------------------------------------------------------------------------------------|-----------------|
| <b><i>Thymus broussonetii</i> Boiss.</b>  | Ziitra    | Diabets                                                                                                                                                                                                 | [88]            |
| <b><i>Ocimum basilicum</i> L.</b>         | hbaq      | Cutaneous infections, oral ulcers, antiseptic, calming, urinary system disorders, allergy, cardiovascular diseases, and pathologies of the urinary system, against mosquito, sinusitis, and tachycardia | [76, 80,81, 93] |
| <b><i>Eucalyptus globulus</i> Labill.</b> | Kalitouse | Gum disease, oral ulcers, dental pain, flu, diabetes, asthma                                                                                                                                            | [76,94]         |
| <b><i>Myrtus communis</i> L.</b>          | Rihan     | Cutaneous infections, gum disease, dental pain, halitosis, healing, antispasmodic, antiseptic, hair care, diarrhea                                                                                      | [76,80,81]      |
| <b><i>Olea europaea</i> L.</b>            | Zitoun    | Cutaneous infections, gum disease, oral ulcers, dental pain                                                                                                                                             | [76,80]         |
| <b><i>Papaver rhoeas</i> L.</b>           | Belâaman  | Cutaneous infections, boils, burns, pimples, scabies, skin cracks, skin diseases, sun burn/tanning, hair problem, kidney problems, diuretic                                                             | [76,78]         |
| <b><i>Ziziphus lotus</i> (L.) Lam</b>     | Sedra     | Headache, joint pain, cardiac ailments, pulmonary infection, haemostatic, colic animals, diabetes, stomach pain, diarrhea, kidney stones, throat pain, pectoral and emollient, jaundice                 | [95]            |
| <b><i>Citrus × limon</i> (L.) Osbeck</b>  | Limon     | Cutaneous infections, diarrhea, digestive problems, oral hygiene, cold, bronchitis                                                                                                                      | [77,89]         |
